# Supplementary material for: The Evaluation of Effective Drugs for the Treatment of Non-Alcoholic Fatty Liver Disease: A Systematic Review and Network Meta-Analysis
Source: PubMed Central journal article supplement (PMC7539311; doi:10.34172/apb.2020.065), 2020-08-09
Supplement: apb-10-542-s001.pdf [file apb-10-542-s001.pdf]

**Supplementary file 1**

**Table S1.** Data extraction table

| Author                                    | Country    | Duration | Type of Group              | Type of Treat meant              |                         |                        | sample size |        |        | Age    |        |        |
|-------------------------------------------|------------|----------|----------------------------|----------------------------------|-------------------------|------------------------|-------------|--------|--------|--------|--------|--------|
|                                           |            |          |                            | Group1                           | Group2                  | Group3                 | Group1      | Group2 | Group3 | Group1 | Group2 | Group3 |
| Marchesini et al (2001) <sup>18</sup>     | Italy      | 4 M      | NASH                       | Metformin 1500 mg/day            | Diet                    |                        | 14          | 6      |        | 40     | 40     |        |
| Athyros et al (2006) <sup>19</sup>        | Greece     | 54 W     | NAFLD( metabolic syndrome) | Atorvastatin, 20 mg/day          | Fenofibrate, 200 mg/day |                        | 63          | 62     |        | 60     | 61     |        |
| Ratziu et al (2008) <sup>20</sup>         | France     | 1 Y      | NASH                       | rosiglitazone (8mg/day)          | placebo                 |                        | 32          | 31     |        | 53.1   | 54.1   |        |
| Hatzitolios A. et al (2004) <sup>21</sup> | Greece     | 24 W     | NAFLD with dyslipidemia    | Omega3 5ml t.i.d.                | Atorvastatin 20mg       | Orlistat 120 mg t.i.d. | 23          | 28     | 21     | 52     | 53     | 50     |
| Fan H. et al (2013) <sup>22</sup>         | China      | 12 W     | T2 diabetes with NAFLD     | Exenatide injection 10mcg b.i.d. | metformin 2g/day        |                        | 49          | 68     |        | 51.02  | 54.68  |        |
| CAPANNI M. et al (2006) <sup>23</sup>     | Italy      | 12 M     | NAFLD                      | Placebo                          | n-3 PUFA                |                        | 14          | 42     |        | 56     | 58     |        |
| Solhi H. et al (2014) <sup>24</sup>       | Iran       | 8 W      | NASH                       | silymarin                        | placebo                 |                        | 33          | 31     |        | 43.6   | 39.36  |        |
| Khoshbaten M. et al (2010) <sup>25</sup>  | Iran       | 3 M      | NAFLD                      | N-acetylcysteine                 | Vit C                   |                        | 15          | 15     |        | 40.1   | 46.8   |        |
| Lindor K. et al (2004) <sup>26</sup>      | Canada, US | 2 Y      | NASH                       | 13 to 15 mg/kg/d of oral UDCA    | Placebo                 |                        | 80          | 86     |        | 45.4   | 48.5   |        |
| Zein C. et al (2011) <sup>27</sup>        | USA        | 1 Y      | NASH                       | pentoxifylline 400 mg t.i.d.     | placebo                 |                        | 26          | 29     |        | 50.5   | 49.6   |        |

|                                               |          |      |                                             |                      |                                        |                    |    |    |    |       |       |       |
|-----------------------------------------------|----------|------|---------------------------------------------|----------------------|----------------------------------------|--------------------|----|----|----|-------|-------|-------|
| Muhammad Amjad Pervez (2017) <sup>28</sup>    |          | 12M  | NAFLD                                       | Tocotrienol          | PLACEBO                                |                    | 31 | 33 |    | 44.7  | 43.9  |       |
| K. Shahebrahimi (2017) <sup>29</sup>          |          |      | NAFLD                                       | two gr/day metformin | 30 mg/day pioglitazone                 | 800 IU/D VITAMIN E | 31 | 31 | 31 | 43.87 | 43.87 | 43.87 |
| Chan Wah Kheong (2017) <sup>30</sup>          | Malaysia | 22 M | NAFLD                                       | silymarin            | placebo                                |                    | 49 | 50 |    | 49.6  | 50.1  |       |
| Jan Oscarsson (2018) <sup>31</sup>            | Sweden   | 3 M  | hypertriglyceridemia OR NAFLD               | Placebo              | Omega-3                                | Fenofibrate        | 26 | 25 | 27 | 59.5  | 60    | 64    |
| Daisuke Ito (2017) <sup>32</sup>              | Japan    | 13 M | NAFLD AND DM-T2                             | Pioglitazone group   | lpravgliflozin group                   |                    | 34 | 32 |    | 59.1  | 57.3  |       |
| Somayyeh Asghari (2018) <sup>33</sup>         | Iran     | 3 M  | NAFLD                                       | placebo              | Resveratrol                            |                    | 30 | 30 |    | 38.5  | 40    |       |
| K. CELINSKI (2014) <sup>34</sup>              | POLAND   | 14 M | NAFLD                                       | tryptophan           | melatonin                              | placebo            | 28 | 23 | 23 |       |       |       |
| Srinivasan Dasarathy, MD (2015) <sup>35</sup> | USA      | 12 M | NAFLD AND DM                                | omega 3 fatty acids  | placebo (CORN OIL)                     |                    | 18 | 19 |    | 51.5  | 49.8  |       |
| Abdelmalek (2009) <sup>36</sup>               | usa      | 27 M | NAFLD                                       | Betaine              | Placebo                                |                    | 27 | 28 |    | 47.8  | 45.7  |       |
| Alam (2016) <sup>37</sup>                     | Italy    | 34 M | NAFLD                                       | Telmisartan          | underwent lifestyle modification alone |                    | 20 | 10 |    | 43.3  | 37.9  |       |
| ALLER (2011) <sup>38</sup>                    | Spain    | 3 M  | NAFLD                                       | probiotic            | placebo                                |                    | 14 | 14 |    |       |       |       |
| Argo (2015) <sup>39</sup>                     | USA      | 3 Y  | NAFLD                                       | Placebo              | N-3 PUFA                               |                    | 17 | 17 |    | 47.2  | 46.4  |       |
| Armstrong(2016) <sup>40</sup>                 | UK       | 48 W | non-alcoholic steatohepatitis               | liraglutide          | Placebo                                |                    | 26 | 26 |    | 50    | 52    |       |
| Balas (2007) <sup>41</sup>                    | USA      | 4 W  | impaired glucose tolerance or T2DM and NASH | pioglitazone         | Placebo                                |                    | 21 | 14 |    | 46.4  | 51    |       |

|                                         |           |      |                              |               |                 |           |     |     |    |       |       |       |
|-----------------------------------------|-----------|------|------------------------------|---------------|-----------------|-----------|-----|-----|----|-------|-------|-------|
| Baniasadi (2015) <sup>42</sup>          | IRAN      | 6 M  | NASH                         | pantoxifyllin | Placebo Group   |           | 15  | 15  |    | 35.7  | 39.4  |       |
| Belfort (2006) <sup>43</sup>            | USA       | 6 M  | nonalcoholic steatohepatitis | Placebo       | Pioglitazone    |           | 21  | 26  |    | 51    | 51    |       |
| Chachay (2014) <sup>44</sup>            | Australia | 8 W  | NAFLD                        | resveratrol   | PLACEBO         |           | 10  | 10  |    | 48.8  | 47.5  |       |
| Chen (2015) <sup>45</sup>               | China     | 3 M  | NAFLD                        | Placebo       | Resveratrol     |           | 30  | 30  |    | 43.5  | 45.2  |       |
| Cui (2016) <sup>46</sup>                | USA       | 6 M  | hepatic steatosis            | sitagliptin   | placebo         |           | 25  | 25  |    | 52.9  | 54.9  |       |
| Cusi (2016) <sup>47</sup>               | USA       | 6 Y  | NASH and prediabetes or T2DM | Placebo       | Pioglitazone    |           | 51  | 50  |    | 49    | 52    |       |
| Deng (2017) <sup>48</sup>               | China     | 3 Y  | NAFLD AND T2DM               | Sitagliptin   | Diet            |           | 36  | 36  |    | 63.7  | 64.1  |       |
| Ebrahimi-Mameghani (2016) <sup>49</sup> | Iran      | 15 M | NAFLD                        | DIET          | linoleic acid   |           | 19  | 19  |    | 36.74 | 38.58 |       |
| Ekhlasli (2017) <sup>50</sup>           | Iran      | 3 M  | NAFLD                        | Probiotic     | Placebo         |           | 32  | 32  |    | 12.7  | 12.6  |       |
| Eslamparast (2014) <sup>51</sup>        | Iran      | 28 W | NAFLD                        | Synbiotic     | Placebo         |           | 26  | 26  |    | 46.35 | 45.69 |       |
| Faghihzadeh (2014) <sup>52</sup>        | Iran      | 12 W | NAFLD                        | Resveratrol   | PLACEBO         |           | 25  | 25  |    | 44.04 | 46.28 |       |
| Feng (2017) <sup>53</sup>               | China     | 6 M  | T2DM with NAFLD              | Liraglutide   | Gliclazide      | Metformin | 29  | 29  | 29 | 46.79 | 48.07 | 46.31 |
| Garinis (2010) <sup>54</sup>            | Italy     | 6 M  | NAFLD                        | Metformin     | Diet            |           | 20  | 25  |    | 40.8  | 45.8  |       |
| Hajiaghahmohammadi(2012) <sup>55</sup>  | Iran      | 4 M  | NAFLD                        | Pioglitazone  | Metformin       | Silymarin | 22  | 22  | 22 | 32.62 | 32.62 | 32.62 |
| Han (2014) <sup>56</sup>                | China     | 6 M  | NAFLD                        | METFORMIN     | Vitamin E       |           | 112 | 111 |    |       |       |       |
| Harrison (2003) <sup>57</sup>           | USA       | 6 M  | Nonalcoholic Steatohepatitis | Placebo       | Vitamin E,VIT.C |           | 22  | 23  |    | 50.2  | 52.5  |       |
| Harrison (2009) <sup>58</sup>           | USA       | 24 M | Nonalcoholic Steatohepatitis | DIET Group    | Orlistat Group  |           | 18  | 23  |    | 45.8  | 47.9  |       |

|                                     |                       |      |                        |                                  |             |  |    |    |  |       |       |  |
|-------------------------------------|-----------------------|------|------------------------|----------------------------------|-------------|--|----|----|--|-------|-------|--|
| Haukeland(2009) <sup>59</sup>       | Norway                | 6 M  | NAFLD                  | Placebo                          | Metformin   |  | 24 | 20 |  | 49.9  | 44.3  |  |
| Heebøll (2016) <sup>60</sup>        | Denmark               | 6 M  | NAFLD                  | Resveratrol                      | PLACEBO     |  | 13 | 13 |  |       |       |  |
| Hirata (2013) <sup>61</sup>         | Japan                 | 12 M | NAFLD and hypertension | Telmisartan                      | Losartan    |  | 12 | 7  |  | 57.7  | 60.3  |  |
| Hussain (2016) <sup>62</sup>        | Pakistan              | 12 W | NAFLD                  | Vildagliptin                     | Placebo     |  | 29 | 29 |  | 28    | 31    |  |
| Khoo (2017) <sup>63</sup>           | Singapore             | 21 M | NAFLD                  | diet                             | Liraglutide |  | 12 | 12 |  | 43.7  | 39    |  |
| LE (2012) <sup>64</sup>             | USA                   | 24 W | NASH                   | Colesevelam                      | Placebo     |  | 25 | 25 |  | 45.4  | 50.3  |  |
| Lee (2008) <sup>65</sup>            | Singapore             | 3 M  | NASH                   | Pentoxifylline                   | PLACEBO     |  | 11 | 9  |  | 47    | 47.89 |  |
| Leuschner (2010) <sup>66</sup>      | Germany AND Greece    | 18 M | NASH                   | UCDA                             | PLACEBO     |  | 95 | 91 |  | 41.45 | 45.02 |  |
| Li (2015) <sup>67</sup>             | China                 | 6 M  | NASH                   | PLACEBO                          | PUFA        |  | 39 | 39 |  | 50.4  | 52.6  |  |
| Loomba (2015) <sup>68</sup>         | USA                   | 24 W | NASH                   | Ezetimibe                        | Placebo     |  | 25 | 25 |  | 49    | 49.5  |  |
| McPherson (2017) <sup>69</sup>      | UK                    | 2 Y  | NAFLD                  | Losartan                         | PLACEBO     |  | 24 | 21 |  | 58    | 45    |  |
| Mendez-Sanchez (2004) <sup>70</sup> | Mexico                | 6 W  | NAFLD                  | UCDA                             | PLACEBO     |  | 12 | 11 |  | 39.7  | 37.8  |  |
| Merat (2003) <sup>71</sup>          | Iran                  | 6 M  | NASH                   | drug:probuco<br>l                | PLACEBO     |  | 18 | 9  |  | 36.3  | 35.9  |  |
| Mofidi (2017) <sup>72</sup>         | Iran                  | 28 W | NAFLD                  | synbiotic<br>supplementa<br>tion | placebo     |  | 21 | 21 |  | 40.9  | 44.61 |  |
| van Wagner (2011) <sup>73</sup>     | USA<br>Chicago,<br>IL | 3 Y  | NAFLD                  | PANTOXYPHY<br>LINE 400 mg        | placebo     |  | 21 | 9  |  | 48    | 53    |  |
| Zelber-Sagi (2006) <sup>74</sup>    | Israel                | 2 M  | NAFLD                  | orlistat 120<br>mg               | placebo     |  | 21 | 23 |  | 48.4  | 47    |  |
| Wah Kheong (2017) <sup>75</sup>     | Malaysia              | 2Y   | NAFLD                  | silymarin 700<br>mg              | placebo     |  | 49 | 50 |  | 49.6  | 50.1  |  |
| Wong (2013) <sup>76</sup>           | China                 | 6M   | NAFLD                  | probiotic                        | DIATE       |  | 10 | 10 |  | 42    | 55    |  |
| Tiikkainen (2004) <sup>77</sup>     | Finland               | 16 W | NAFLD                  | Rosiglitazone                    | Metformin   |  | 9  | 11 |  | 50    | 46    |  |

|                                |        |      |                |                  |                                     |                                       |     |     |    |       |       |      |
|--------------------------------|--------|------|----------------|------------------|-------------------------------------|---------------------------------------|-----|-----|----|-------|-------|------|
| Zhu (2008) <sup>78</sup>       | China  | 24 W | NAFLD          | n-3 PUFA         | placebo                             |                                       | 66  | 68  |    | 45    | 44.03 |      |
| Mudaliar (2013) <sup>79</sup>  | USA    | 6 W  | NAFLD AND T2DM | Placebo          | 25 mg OBETICHO LIC ACID             | 50 mg OBETIC Holic ACID               | 23  | 20  | 21 | 53.1  | 52.7  | 50.5 |
| Nelson (2009) <sup>80</sup>    | USA    | 72 W | FLINT          | Obeticholic acid | PLACEBO                             |                                       | 141 | 142 |    | 52    | 51    |      |
| Nogueira (2016) <sup>81</sup>  | Brazil | 6 M  | NASH           | OMEGA - 3        | PLACEBO                             |                                       | 27  | 23  |    | 53.9  | 52.5  |      |
| Omer (2009-10) <sup>82</sup>   | Turkey | 1 Y  | NAFLD          | metaformin       | Rosiglitazone                       | METformin+ROSiglitazoe                | 22  | 20  | 22 | 48    | 49.3  | 49.6 |
| PAKRAVAN(2017) <sup>83</sup>   | Iran   | 3 M  | NAFLD          | Melatonin        | PLACEBO                             |                                       | 47  | 48  |    | 42.5  | 40.6  |      |
| Parikh (2016) <sup>84</sup>    | India  | 52 W | NAFLD          | (Vitamin E)      | (UDCA)                              |                                       | 95  | 138 |    | 43.75 | 40.19 |      |
| Ratzu (2016) <sup>85</sup>     | USA    | 52 W | NAFLD          | Placebo          | Elafibranor , 80 mg                 | Elafibranor , 120 mg                  | 92  | 93  | 89 | 52.4  | 52.7  | 52.4 |
| Razavizade(2013) <sup>86</sup> | Iran   | 4 M  | NAFLD          | Metformin        | Pioglitazone                        |                                       | 40  | 40  |    | 36.35 | 34.2  |      |
| Santos (2003) <sup>87</sup>    | Brazil | 3 M  | NAFLD          | UDCA             | PLACEBO                             |                                       | 15  | 15  |    | 38.4  | 36.6  |      |
| SANYAL (2010) <sup>88</sup>    | USA    | 96 W | NASH           | Placebo          | Vitamin E                           | Pioglitazone                          | 83  | 84  | 80 | 45.4  | 46.6  | 47   |
| SANYAL (2014) <sup>89</sup>    | USA    | 2 Y  | NASH           | Placebo          | EPA-E(eicosapentanoic ) (1800 mg/d) | EPA-E(eicosapentanoic (n ¼ 2700 mg/d) | 72  | 82  | 86 | 50.5  | 47.8  | 47.8 |
| Sharma (2012) <sup>90</sup>    | India  | 6 M  | NASH           | Pentoxifylline   | Pioglitazone                        |                                       | 11  | 9   |    | 37.3  | 40.4  |      |
| Qin (2015) <sup>91</sup>       | China  | 3 M  | NAFLD          | CORN OIL         | FISH OIL                            |                                       | 34  | 36  |    | 44.3  | 46    |      |
| Shibuya (2017) <sup>92</sup>   | Japan  | 3 M  | NAFLD          | Luseogliflozin   | Metformin                           |                                       | 16  | 16  |    | 51    | 60    |      |
| Takeshita (2014) <sup>93</sup> | Japan  | 6 M  | NAFLD          | DIET             | Ezetimibe                           |                                       | 14  | 17  |    | 55.5  | 50.4  |      |
| Sofi (2010) <sup>94</sup>      | Italy  | 12 M | NAFLD          | N3 PUFA          | diet                                |                                       | 6   | 5   |    | 55    | 54    |      |
| Chen (2008) <sup>95</sup>      | China  | 24 W | NAFLD or NASH  | Placebo          | Omega-3 8cap/day                    | Omega-3 10cap/day                     | 16  | 15  | 15 | 45    | 47    | 46   |

|                                      |        |      |                                           |                                    |                         |  |     |    |  |      |      |  |
|--------------------------------------|--------|------|-------------------------------------------|------------------------------------|-------------------------|--|-----|----|--|------|------|--|
| Shenoy (2014) <sup>96</sup>          | Italy  | 16 W | NASH                                      | Metadoxine<br>500mg/day            | Placebo                 |  | 75  | 59 |  | 39.8 | 41.1 |  |
| Hameed (2017) <sup>97</sup>          | USA    | 96 W | NASH                                      | Obeticholic<br>acid+weight<br>loss | Placebo+w<br>eight loss |  | 102 | 98 |  | 52   | 50   |  |
| Amirkhizi<br>(2018) <sup>98</sup>    | Iran   | 12 W | NAFLD patients<br>with<br>obesity         | ALA                                | Placebo                 |  | 23  | 22 |  | 40.6 | 38.8 |  |
| Shafi Kuchay<br>(2018) <sup>99</sup> | India  | 20 W | NAFLD Patients<br>With Type 2<br>Diabetes | Empagliflozin                      | diet                    |  | 22  | 20 |  |      |      |  |
| Sofer (2011) <sup>100</sup>          | Israel | 16 W | NAFLD                                     | Metformin                          | Placebo                 |  | 32  | 31 |  | 51.9 | 55.2 |  |
| Abenavoli<br>(2017) <sup>101</sup>   | Italy  | 24 W | NAFLD                                     | Mediterrane<br>an diet             | without<br>drug         |  | 20  | 10 |  | 52   | 33   |  |
